# Supplementary material for: Estudio de la película lagrimal y la superficie conjuntival después de la excisión del pterigion
Source: Royal Society of Chemistry journal article supplement (doi:10.1039/c1ob06421e), 2012-06-27
Supplement: c1ob06421e.pdf [file c1ob06421e.pdf]

# Metal-mediated DNA assembly using the ethynyl linked terpyridine ligand

Thomas Ehenschwender, Anna Barth, Holger Puchta, Hans-Achim Wagenknecht\*

Thomas Ehenschwender, Anna Barth, Holger Puchta, Hans-Achim Wagenknecht\*

*Karlsruhe Institute of Technology, Institute for Organic Chemistry, Fritz-Haber-Weg 2, 76131 Karlsruhe, Germany*

*Wagenknecht@kit.edu*

## Supporting Information

### Table of content

|                                                                                    |    |
|------------------------------------------------------------------------------------|----|
| Materials and Methods.....                                                         | 2  |
| Synthesis of the terpy-dU DNA building block .....                                 | 2  |
| Synthesis and Characterization of <b>DNA1 – 6</b> .....                            | 7  |
| Melting temperatures of <b>DNA3</b> with different counter bases for terpy-dU..... | 8  |
| Titration experiments with <b>DNA1A</b> and <b>DNA5A</b> .....                     | 8  |
| Titration experiments with <b>DNA1-2</b> and <b>DNA5-6</b> .....                   | 10 |
| SB-PAGE Experiments.....                                                           | 12 |
| References.....                                                                    | 13 |

## Materials and Methods

Chemicals and dry solvents were purchased from commercial suppliers and were used without further purification unless otherwise mentioned. TLC was performed on Fluka silica gel F254 coated aluminium foil. Flash chromatography was carried out with Silica Gel 60 from Aldrich (43 – 60  $\mu\text{m}$ ). Spectroscopic measurements were recorded in Na-Pi buffer solution (10 mM, pH 7) using quartz glass cuvettes ( $l = 10$  mm). Mass spectra were measured in the central analytical facility of the institute. NMR spectra were recorded on a Bruker Advance 300 or Advance 600 spectrometer at 300 K in deuterated solvents. Chemical shifts are given in ppm relative to TMS. Absorption spectra and melting temperatures (2.5  $\mu\text{M}$  DNA, 20 – 90  $^{\circ}\text{C}$ , 0.7  $^{\circ}\text{C}/\text{min}$ , step width 0.5  $^{\circ}\text{C}$ ) were recorded on a Varian Carry 100 spectrometer equipped with a 6x6 cell changer unit. Fluorescence was measured on a Jobin-Yvon Fluoromax 3 fluorimeter with a step width of 1 nm and an integration time of 0.2 s. All spectra were recorded with an excitation and emission bypass of 5 nm and are corrected for Raman emission of the buffer solution. The phosphoramidite of terpy-dU (**4**) was synthesized according to Scheme S1. 4'-Ethynyl-2,2':6',2''-terpyridine (**1**) was synthesized according to literature reports.<sup>1-3</sup> DMT-protected 5-Iodo-deoxyuridine (**2**) was synthesized according to literature.<sup>4</sup>

### Synthesis of the terpy-dU DNA building block

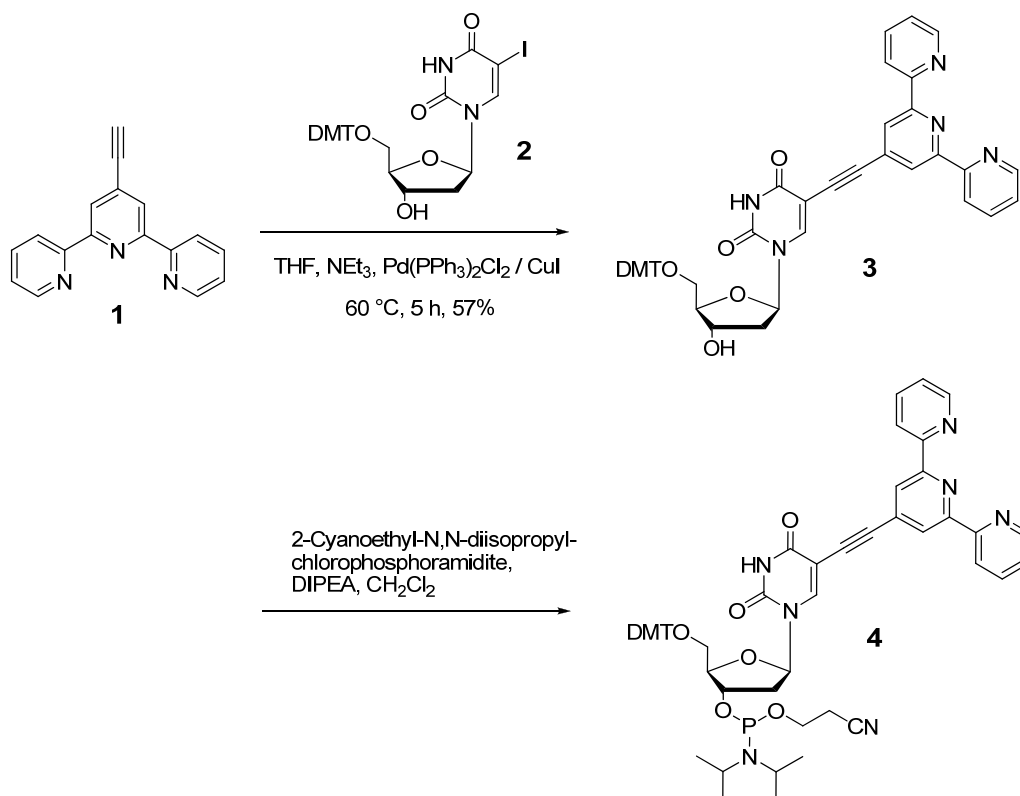

**Scheme S1:** Synthesis of the terpy-dU phosphoramidite building block

**(3) 5-[(2,2':6',2''-Terpyridin-4'-yl)ethynyl]-5'-O-[(bis-(4-methoxyphenyl)(phenyl)methoxy]-2'-deoxyuridine**

**2** (460 mg, 0.70 mmol) was dissolved in 10 mL dry THF under Argon-Atmosphere. **1** (150 mg, 0.58 mmol), Pd(PPh<sub>3</sub>)<sub>2</sub>Cl<sub>2</sub> (40 mg, 0.057 mmol), CuI (11 mg, 0.058 mmol) and abs. NEt<sub>3</sub> (5 mL) were added and the reaction mixture was purged with Argon for 15 min. The mixture was heated to 60 °C for 5 h. The solvent was removed under reduced pressure and the crude product was pre-purified by flash chromatography (CH<sub>2</sub>Cl<sub>2</sub>/MeOH 10:1 + 3% NEt<sub>3</sub>). The pure product **3** was obtained after a second purification step by flash chromatography on reversed phase (MeOH) as a white solid (264 mg, 0.34 mmol, yield: 58%).

<sup>1</sup>H NMR (CD<sub>2</sub>Cl<sub>2</sub>, 600 MHz) δ 8.61 (d, 2H, *J* = 3.8 Hz), 8.56 (d, 1H, *J* = 7.9 Hz), 8.26 (s, 2H), 8.13 (s, 1H), 7.85 (t, 2H, *J* = 7.6 Hz), 7.41 (d, 2H, *J* = 7.6 Hz), 7.32 (m, 6H), 7.21 (t, 2H, *J* = 7.6 Hz), 7.11 (t, 1H, *J* = 7.3 Hz), 6.75 (m, 4H), 6.33 (t, 1H, *J* = 5.8 Hz), 4.61 (m, 1H), 4.14 (m, 1H), 3.60 (2 x s, 2 x 3H), 3.41 (dd, 1H, *J*<sub>1</sub> = 10.5 Hz, *J*<sub>2</sub> = 3.8 Hz), 3.31 (dd, 1H, *J*<sub>1</sub> = 10.5 Hz), 2.59 (m, 1H), 2.46 (td, 1H, *J*<sub>1</sub> = *J*<sub>2</sub> = 6.6 Hz); <sup>13</sup>C NMR (CD<sub>2</sub>Cl<sub>2</sub>, 150 MHz) δ 161.6, 159.0, 159.0, 155.8, 155.8, 149.7, 149.5, 145.0, 144.0, 137.2, 136.1, 135.7, 132.8, 130.3, 130.2, 128.4, 128.2, 127.3, 124.4, 123.0, 121.4, 113.6, 113.6, 99.6, 91.7, 87.2, 86.9, 86.4, 85.3, 72.2, 64.1, 55.4, 41.8; HR-FAB-MS *m/z* (calcd.) = 786.2928 [M-H<sup>+</sup>]; *m/z* (found) = 786.2932 [M-H<sup>+</sup>]

**(4) 5-[(2,2':6',2''-Terpyridin-4'-yl)ethynyl]-3'-O-((2-Cyanoethoxy)(diisopropylamino)phosphinyl)-5'-O-[(bis-(4-methoxyphenyl)(phenyl)methoxy]-2'-deoxyuridine**

**3** (100 mg, 0.13 mmol) was dissolved in 3 mL dry CH<sub>2</sub>Cl<sub>2</sub> under Argon-Atmosphere. Dry DIPEA (110 μL, 0.64 mmol) and 2-Cyanoethyl*N,N*-diisopropylchlorophosphoramidite (114 μL, 0.51 mmol) were added and the mixture was stirred at room temperature over night. The reaction mixture was washed with freshly prepared aq. NaHCO<sub>3</sub> solution and the organic layer was dried over Na<sub>2</sub>SO<sub>4</sub>. The solvent was removed in vacuum to yield **4** (125 mg, 0.13 mmol, yield: 99%) which was used for DNA synthesis without further purification.

<sup>31</sup>P NMR (d<sub>6</sub>-DMSO, 121 MHz) δ 148.4, 148.7;

<sup>1</sup>H-NMR of **3**:

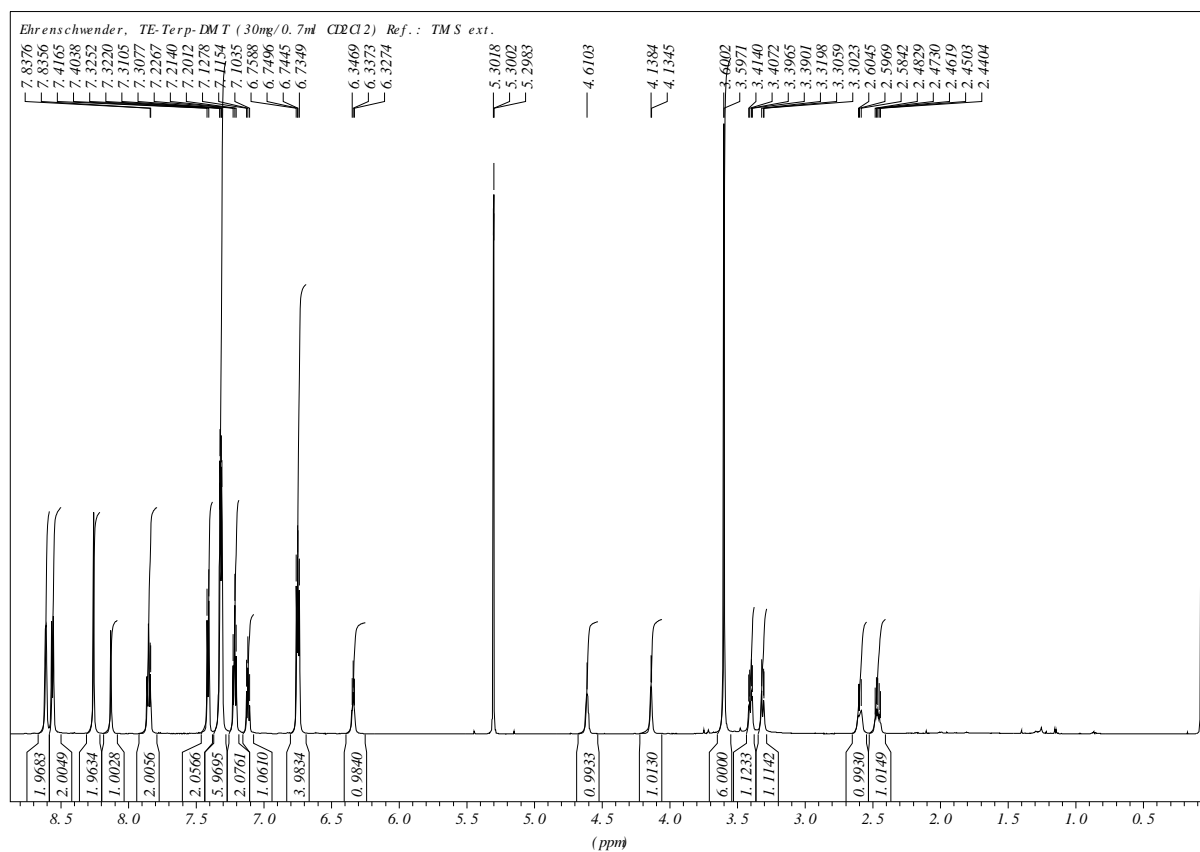

<sup>13</sup>C-NMR of **3**:

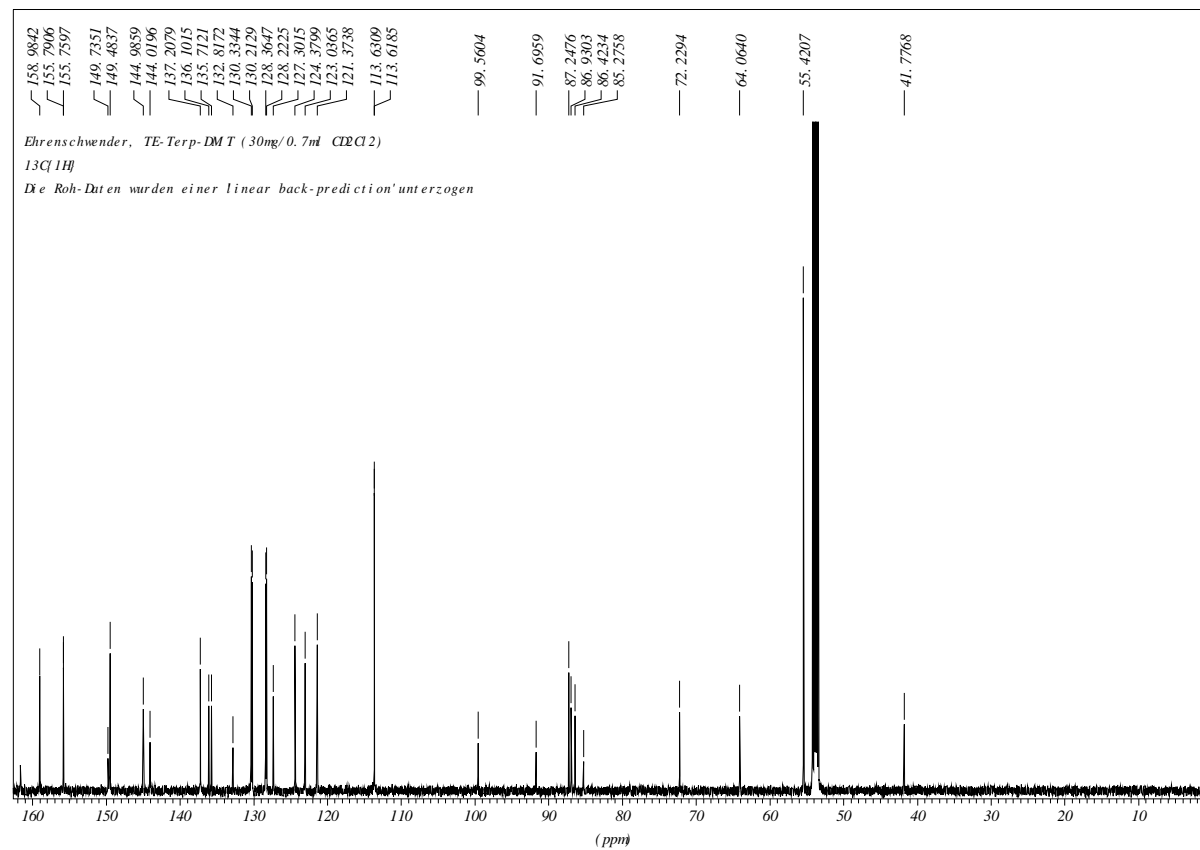

### FAB-MS of 3:

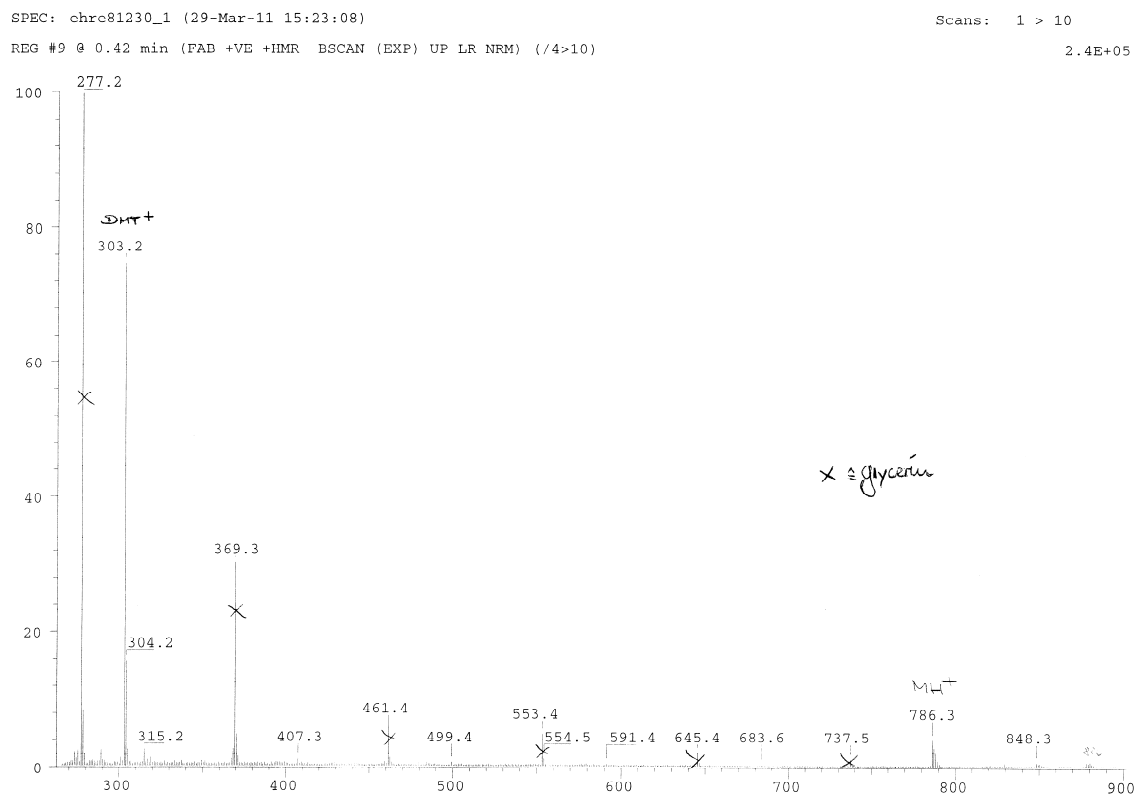

### HR-FAB-MS of 3:

|        | UCLR       | USER LIST FILE (4x500): ehre2 |         | SAVE    |         |
|--------|------------|-------------------------------|---------|---------|---------|
| 1:     |            | 786.28254                     | 0.00000 | 0.00000 | 0.00000 |
| 2:     |            | 786.29384                     | 0.00000 | 0.00000 | 0.00000 |
| 3:     |            | 786.29868                     | 0.00000 | 0.00000 | 0.00000 |
| 4:     |            | 786.30046                     | 0.00000 | 0.00000 | 0.00000 |
| 5:     |            | 786.29045                     | 0.00000 | 0.00000 | 0.00000 |
| 6:     |            | 0.00000                       | 0.00000 | 0.00000 | 0.00000 |
| 7:     |            | 0.00000                       | 0.00000 | 0.00000 | 0.00000 |
| 8:     |            | 0.00000                       | 0.00000 | 0.00000 | 0.00000 |
| 9:     |            | 0.00000                       | 0.00000 | 0.00000 | 0.00000 |
| 10:    |            | 0.00000                       | 0.00000 | 0.00000 | 0.00000 |
| 11:    |            | 0.00000                       | 0.00000 | 0.00000 | 0.00000 |
| 12:    |            | 0.00000                       | 0.00000 | 0.00000 | 0.00000 |
| 13:    |            | 0.00000                       | 0.00000 | 0.00000 | 0.00000 |
| 14:    |            | 0.00000                       | 0.00000 | 0.00000 | 0.00000 |
| 15:    |            | 0.00000                       | 0.00000 | 0.00000 | 0.00000 |
| 16:    |            | 0.00000                       | 0.00000 | 0.00000 | 0.00000 |
| 17:    |            | 0.00000                       | 0.00000 | 0.00000 | 0.00000 |
| 18:    |            | 0.00000                       | 0.00000 | 0.00000 | 0.00000 |
| 19:    |            | 0.00000                       | 0.00000 | 0.00000 | 0.00000 |
| 20:    |            | 0.00000                       | 0.00000 | 0.00000 | 0.00000 |
| LINK   | NONE       | NONE                          | NONE    | NONE    | NONE    |
| SIZE   | 5.00000    | 0.00000                       | 0.00000 | 0.00000 | 0.00000 |
| MEAN   | 786.29319  | 0.00000                       | 0.00000 | 0.00000 | 0.00000 |
| SUM    | 3931.46597 | 0.00000                       | 0.00000 | 0.00000 | 0.00000 |
| S.D.   | 0.00715    | 0.00000                       | 0.00000 | 0.00000 | 0.00000 |
| MAX    | 786.30046  | 0.00000                       | 0.00000 | 0.00000 | 0.00000 |
| MIN    | 786.28254  | 0.00000                       | 0.00000 | 0.00000 | 0.00000 |
| ULIST: |            |                               |         |         |         |

Limit: ( 0 )  
: ( 160 ) C100.H100.N10.O10  
Peak: 400.00 mmu R+D: -0.5 > 50.0

Mass of { 786.2932 } = 786.293200000  
Abs Abun. .5680026412

| Delta (ppm) | R+   | Formula        |
|-------------|------|----------------|
| -5.4254     | 30.5 | C47.H40.N5.O7  |
| 1.15845     | 35.5 | C48.H36.N9.O3  |
| 1.16504     | 30.0 | C49.H42.N2.O8  |
| -1.1882     | 43.0 | C61.H38.O      |
| -2.2501     | 31.0 | C45.H38.N8.O6  |
| 2.86603     | 35.0 | C50.H38.N6.O4  |
| -2.8958     | 43.5 | C59.H36.N3     |
| -3.9511     | 26.0 | C44.H42.N4.O10 |
| 4.56702     | 40.0 | C51.H34.N10    |
| 4.57361     | 34.5 | C52.H40.N3.O5  |
| -5.6587     | 26.5 | C42.H40.N7.O9  |
| 6.27461     | 39.5 | C53.H36.N7.O   |
| 6.28120     | 34.0 | C54.H42.O6     |
| -6.3043     | 39.0 | C56.H38.N2.O3  |
| -7.3663     | 27.0 | C40.H38.N10.O8 |
| 7.98219     | 39.0 | C55.H38.N4.O2  |
| -8.0119     | 39.5 | C54.H36.N5.O2  |
| 8.62783     | 26.5 | C41.H40.N9.O8  |
| 9.6898      | 38.5 | C57.H40.N.O3   |
| -9.713      | 34.5 | C53.H40.N.O6   |
| -9.720      | 40.0 | C52.H34.N8.O   |
| 10.3354     | 26.0 | C43.H42.N6.O9  |
| -11.420     | 35.0 | C51.H38.N4.O5  |
| 12.0364     | 31.0 | C44.H38.N10.O5 |
| 12.0430     | 25.5 | C45.H44.N3.O10 |
| 13.0983     | 43.0 | C60.H38.N2     |
| -13.121     | 30.0 | C50.H42.O9     |
| -13.128     | 35.5 | C49.H36.N7.O4  |
| 13.7440     | 30.5 | C46.H40.N7.O6  |
| -14.829     | 30.5 | C48.H40.N3.O8  |
| -14.836     | 36.0 | C47.H34.N10.O3 |

### <sup>31</sup>P NMR of 4:

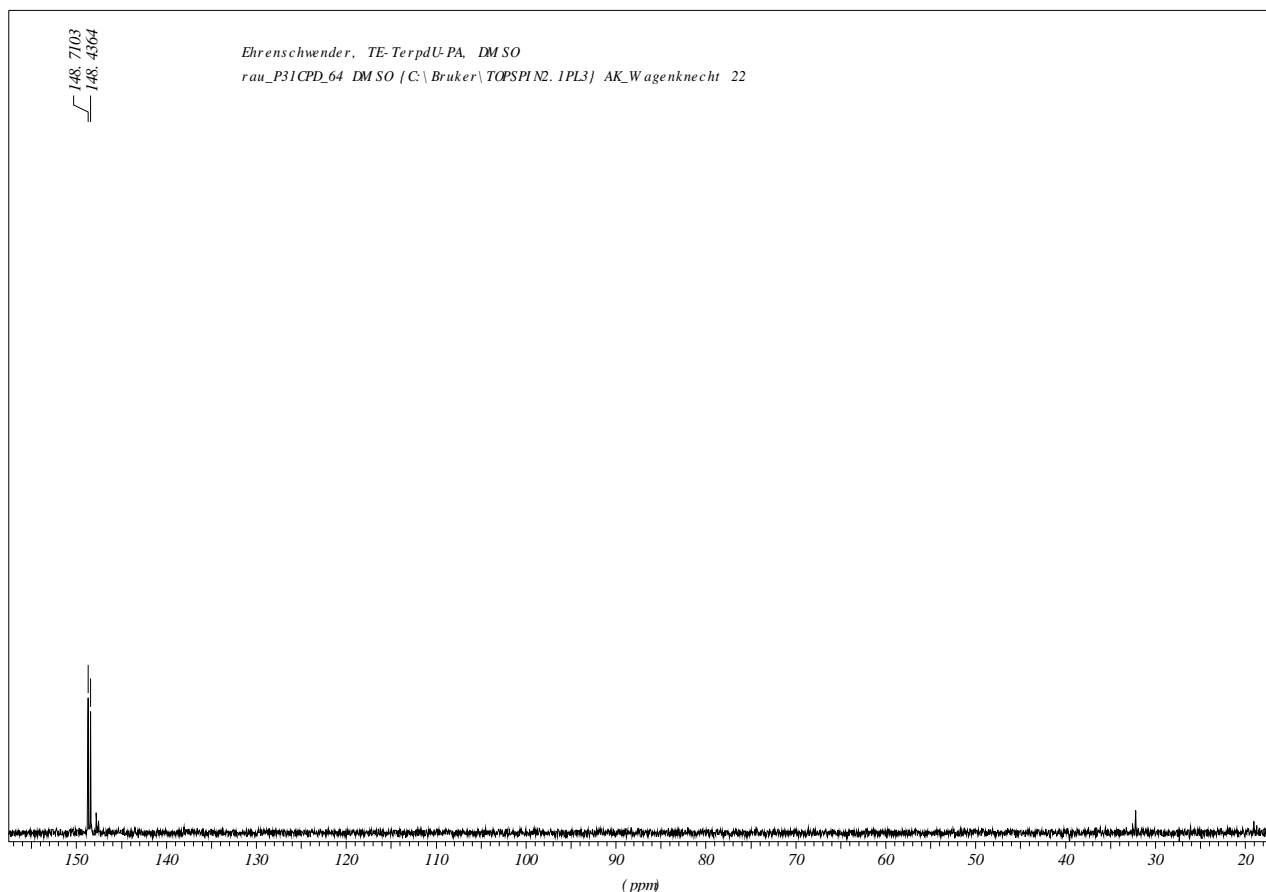

## Synthesis and Characterization of DNA1 – 6

The oligonucleotides were prepared on an Expetide 8909 DNA synthesizer (Applied Biosystems) via standard phosphoramidite protocols using CPGs (1  $\mu\text{mol}$ ) with longer coupling times of 500 s and higher concentration of phosphoramidite (0.1 M). The chemicals for the DNA synthesis were purchased from ABI and Glen Research. After preparation, the trityl-off oligonucleotides were cleaved of the resin and deprotected with conc.  $\text{NH}_4\text{OH}$  at  $55^\circ\text{C}$  for 10 h. The oligonucleotides were dried and purified by reversed phase HPLC using the following conditions: A =  $\text{NH}_4\text{OAc}$  buffer (50 mM), pH = 6.5; B = MeCN; gradient = 0 - 20% B over 40 min. The oligonucleotides were lyophilized and quantified by their absorbance at 260 nm on a Varian Carry 100 spectrometer. Duplexes of DNA1 – 6 were prepared by heating the modified oligonucleotides in presence of 1.2 equiv. of unmodified complementary strand to  $90^\circ\text{C}$ , followed by cooling to room temperature. If both strands were modified a 1:1 ratio was used for hybridization.

**Table S1:** MS analysis and extinction coefficients of the oligonucleotides DNA1-6

| Oligonucleotide | Calculated mass [g/mol] | Observed mass [g/mol]                     | $\epsilon_{260}$ [ $\text{mM}^{-1} \text{cm}^{-1}$ ] |
|-----------------|-------------------------|-------------------------------------------|------------------------------------------------------|
| DNA1            | 5390                    | 1796.7 [M-3H <sup>+</sup> ] <sup>3-</sup> | 162.9                                                |
|                 |                         | 1347.2 [M-4H <sup>+</sup> ] <sup>4-</sup> |                                                      |
| DNA2            | 5457                    | 1819.0 [M-3H <sup>+</sup> ] <sup>3-</sup> | 184.7                                                |
|                 |                         | 1363.9 [M-4H <sup>+</sup> ] <sup>4-</sup> |                                                      |
| DNA3            | 5440                    | 1813.3 [M-3H <sup>+</sup> ] <sup>3-</sup> | 168.2                                                |
|                 |                         | 1359.6 [M-4H <sup>+</sup> ] <sup>4-</sup> |                                                      |
| DNA4            | 5409                    | 1803.2 [M-3H <sup>+</sup> ] <sup>3-</sup> | 170.1                                                |
|                 |                         | 1351.9 [M-4H <sup>+</sup> ] <sup>4-</sup> |                                                      |
| DNA5            | 5405                    | 1801.8 [M-3H <sup>+</sup> ] <sup>3-</sup> | 164.3                                                |
|                 |                         | 1351.0 [M-4H <sup>+</sup> ] <sup>4-</sup> |                                                      |
| DNA6            | 5450                    | 1816.8 [M-3H <sup>+</sup> ] <sup>3-</sup> | 194.0                                                |
|                 |                         | 1362.2 [M-4H <sup>+</sup> ] <sup>4-</sup> |                                                      |

### Melting temperatures of DNA3 with different counter bases for terpy-dU

All melting temperatures were determined by the change of absorbance at 260nm using the following conditions: 2.5  $\mu\text{M}$  DNA, 10 mM NaPi buffer, 250 mM NaCl; heating/cooling rate 0.7°C/min, data interval 0.5°C.

**Table S2:** Melting temperatures for DNA3 with different counter bases for terpy-dU;  $\Delta T_m$  values are calculated compared to the fully matched unmodified duplex with T instead of terpy-dU ( $T_m = 68.0^\circ\text{C}$ )

| Duplex | $T_m$ [ $^\circ\text{C}$ ] | $\Delta T_m$ [ $^\circ\text{C}$ ] |
|--------|----------------------------|-----------------------------------|
| DNA3A  | 63.9                       | - 4.1                             |
| DNA3T  | 63.2                       | - 4.8                             |
| DNA3G  | 60.3                       | - 7.7                             |
| DNA3C  | 60.8                       | - 7.2                             |

### Titration experiments with terpy-dU modified oligonucleotides

The oligonucleotides were hybridised in absence of metal-ions. For the titration experiments freshly prepared 200  $\mu\text{M}$   $\text{NiCl}_2$ ,  $\text{ZnCl}_2$ ,  $\text{CuCl}_2$  and  $\text{ZnCl}_2$  solutions were used. To allow a good complexation we waited 90 min between the single titration steps. The emission spectra were recorded after excitation at 345 nm. The following concentrations were used for all experiments: 2.5  $\mu\text{M}$  modified DNA, 3.0  $\mu\text{M}$  unmodified counter strand, 10 mM NaPi buffer, 250 mM NaCl.

### Titration experiments with DNA1A and DNA5A

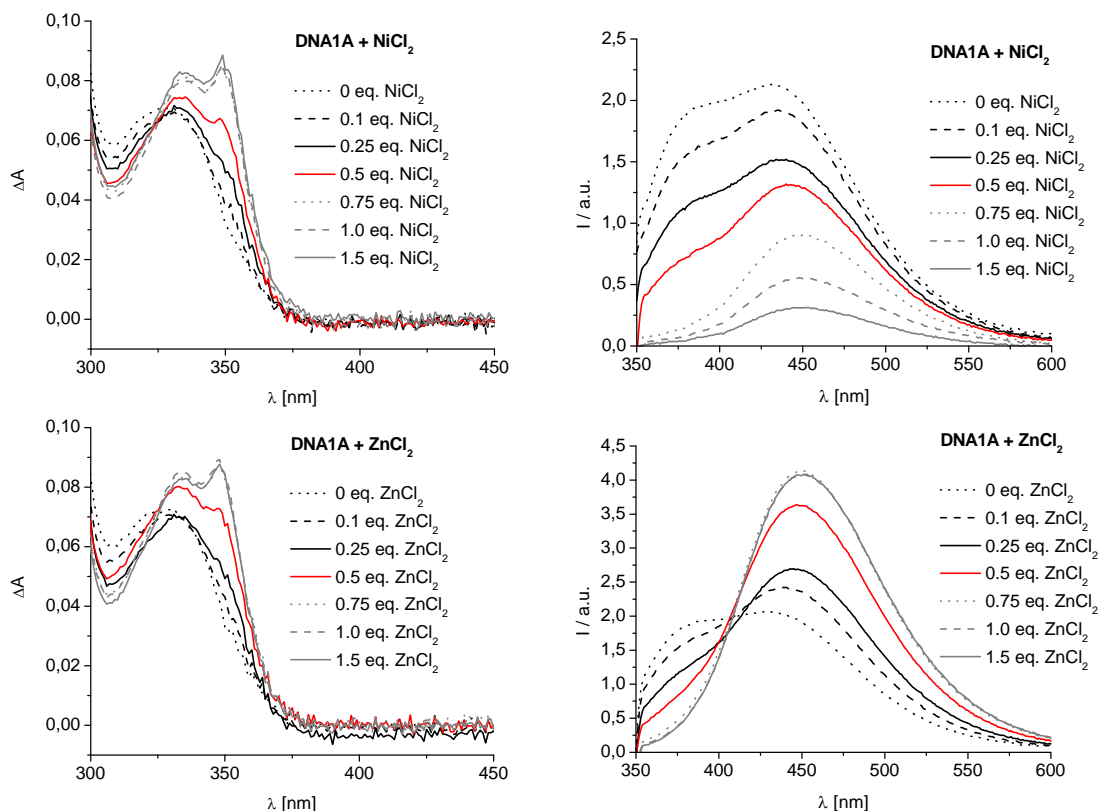



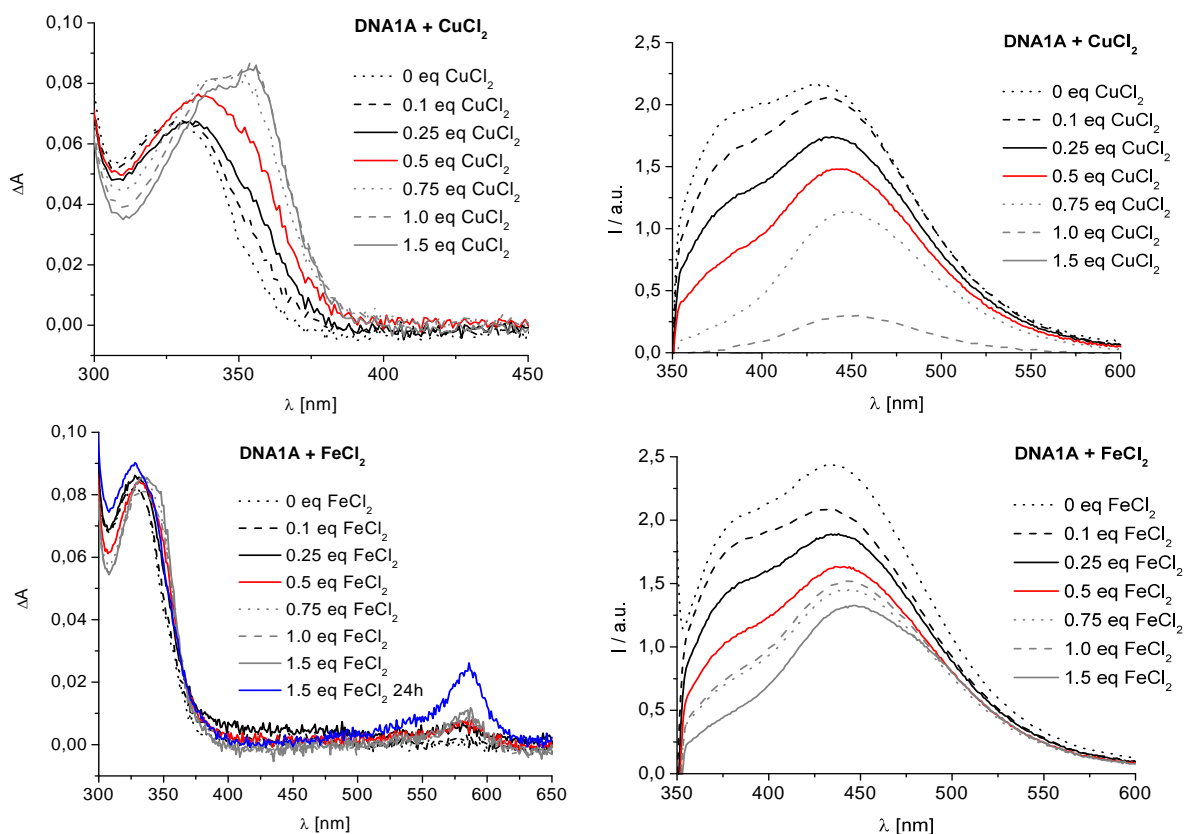

**Fig. S1:** Changes in the absorption and emission spectra of DNA1A upon addition of NiCl<sub>2</sub>, ZnCl<sub>2</sub>, CuCl<sub>2</sub> and FeCl<sub>2</sub> ( $\lambda_{\text{ex}} = 345$  nm)

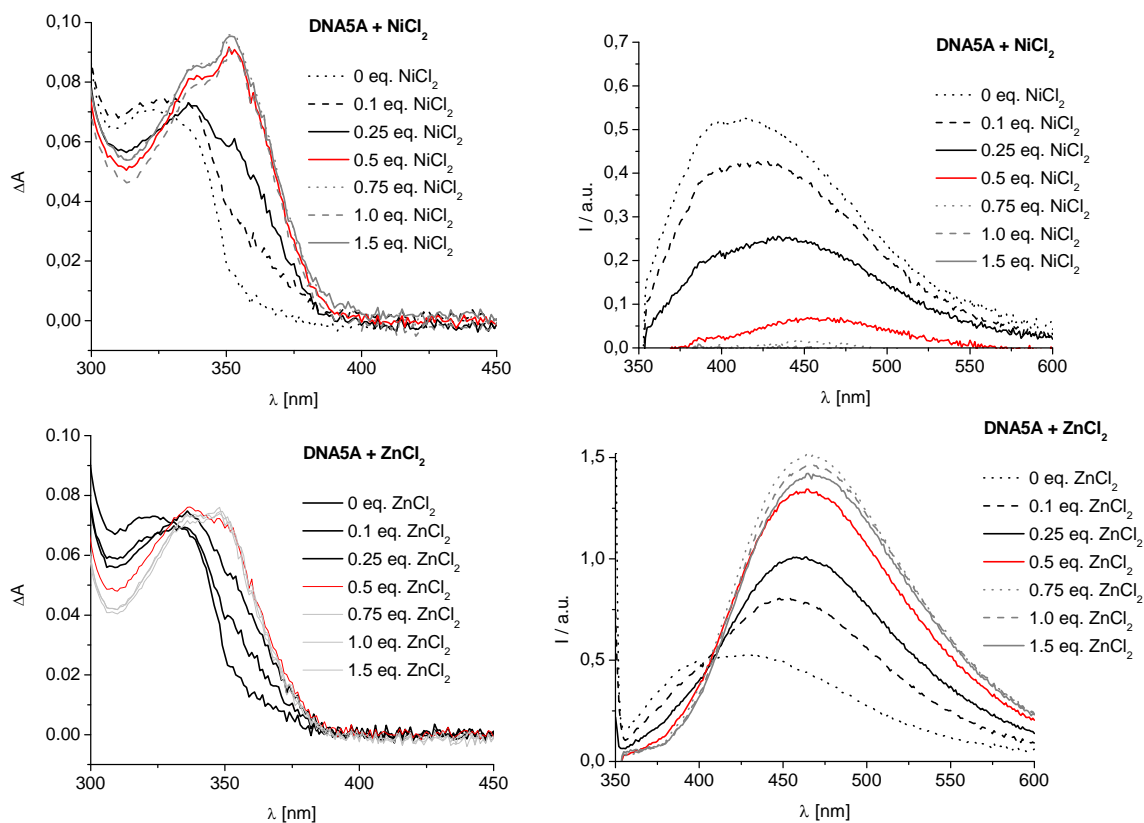

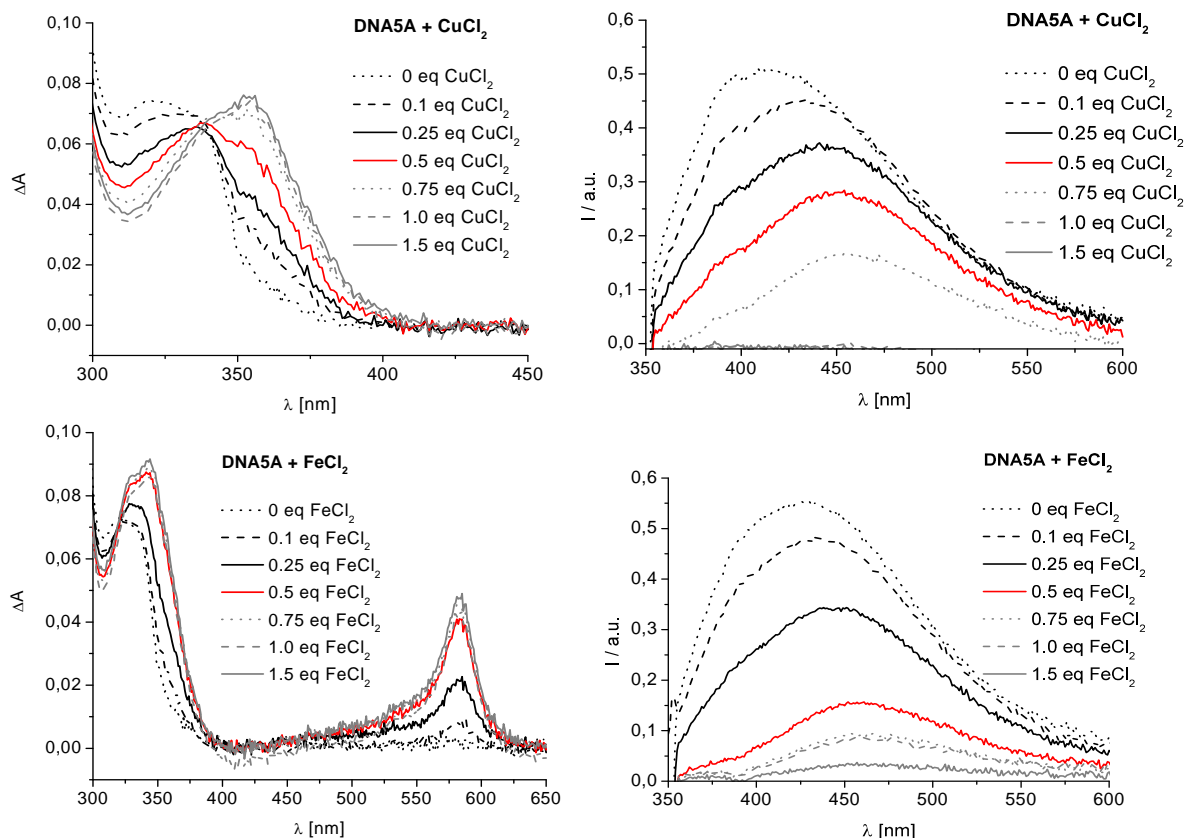

**Fig. S2:** Changes in the absorption and emission spectra of DNA5A upon addition of NiCl<sub>2</sub>, ZnCl<sub>2</sub>, CuCl<sub>2</sub> and FeCl<sub>2</sub> ( $\lambda_{\text{ex}} = 345 \text{ nm}$ )

### Titration experiments with DNA1-2 and DNA5-6

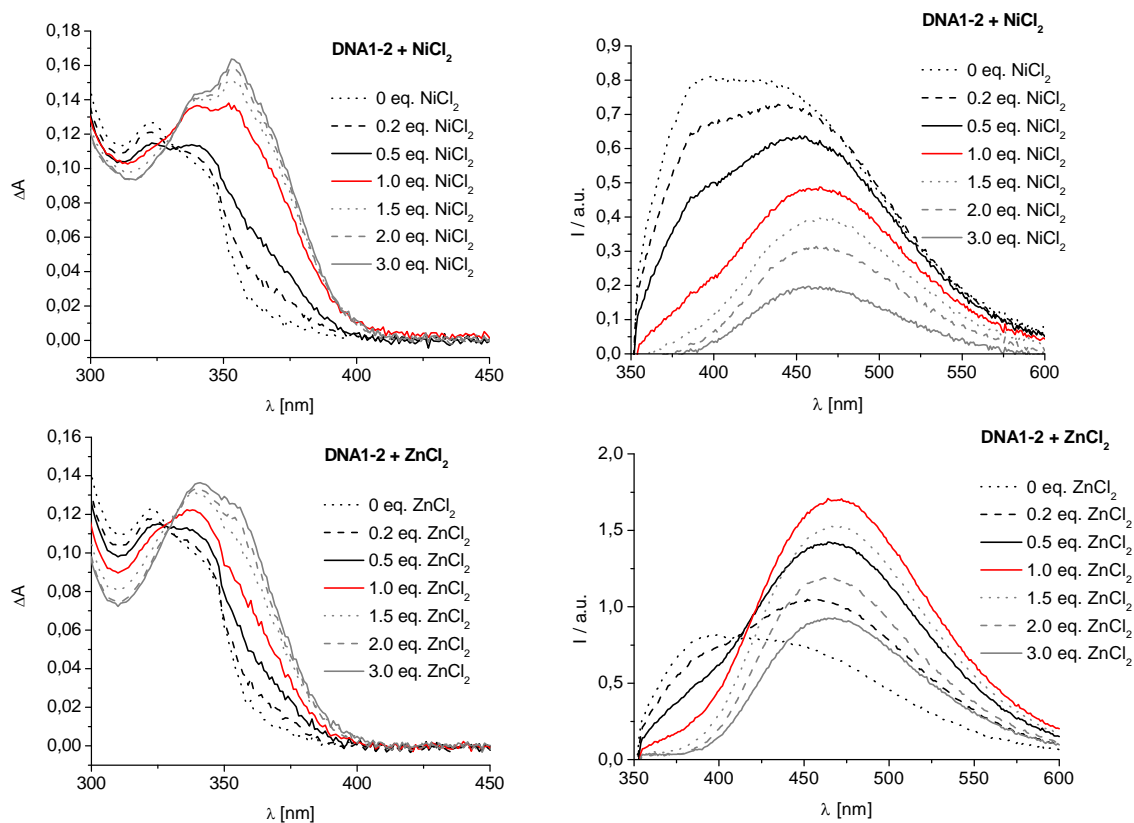

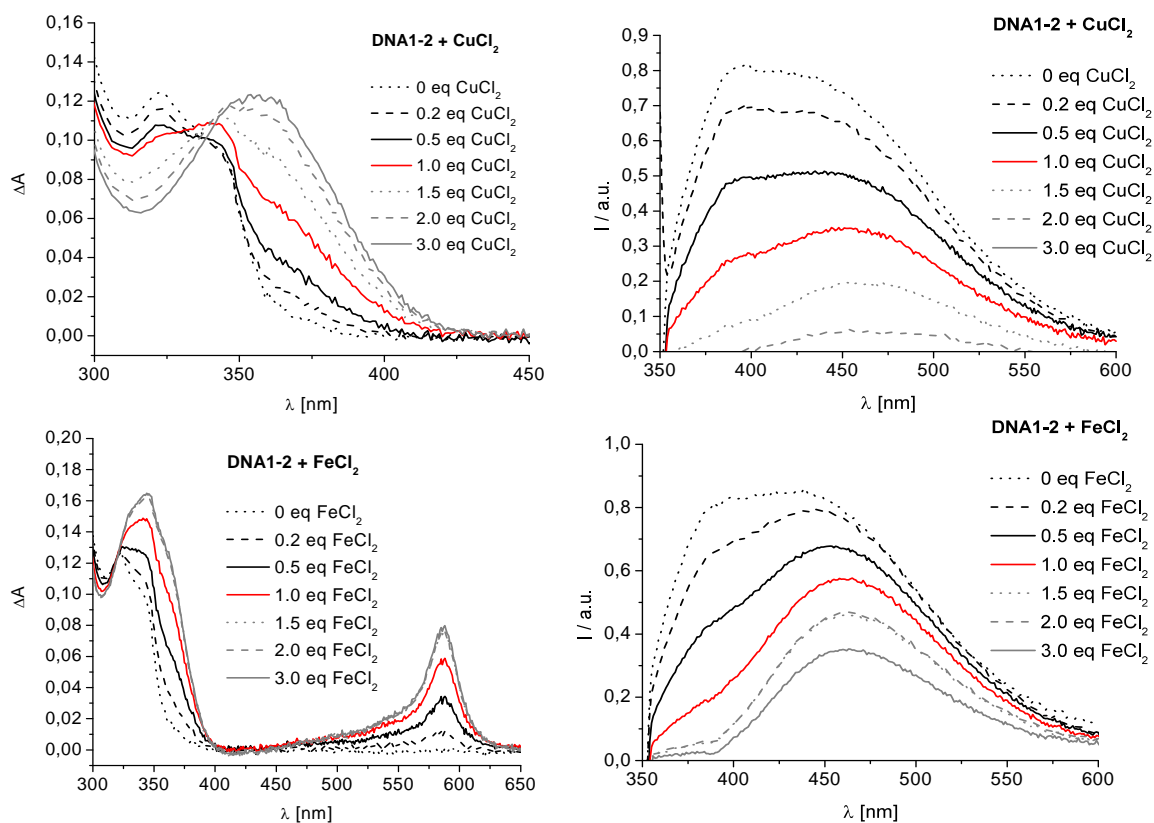

**Fig. S3:** Changes in the absorption and emission spectra of DNA1-2 upon addition of NiCl<sub>2</sub>, ZnCl<sub>2</sub>, CuCl<sub>2</sub> and FeCl<sub>2</sub> ( $\lambda_{\text{ex}} = 345$  nm)

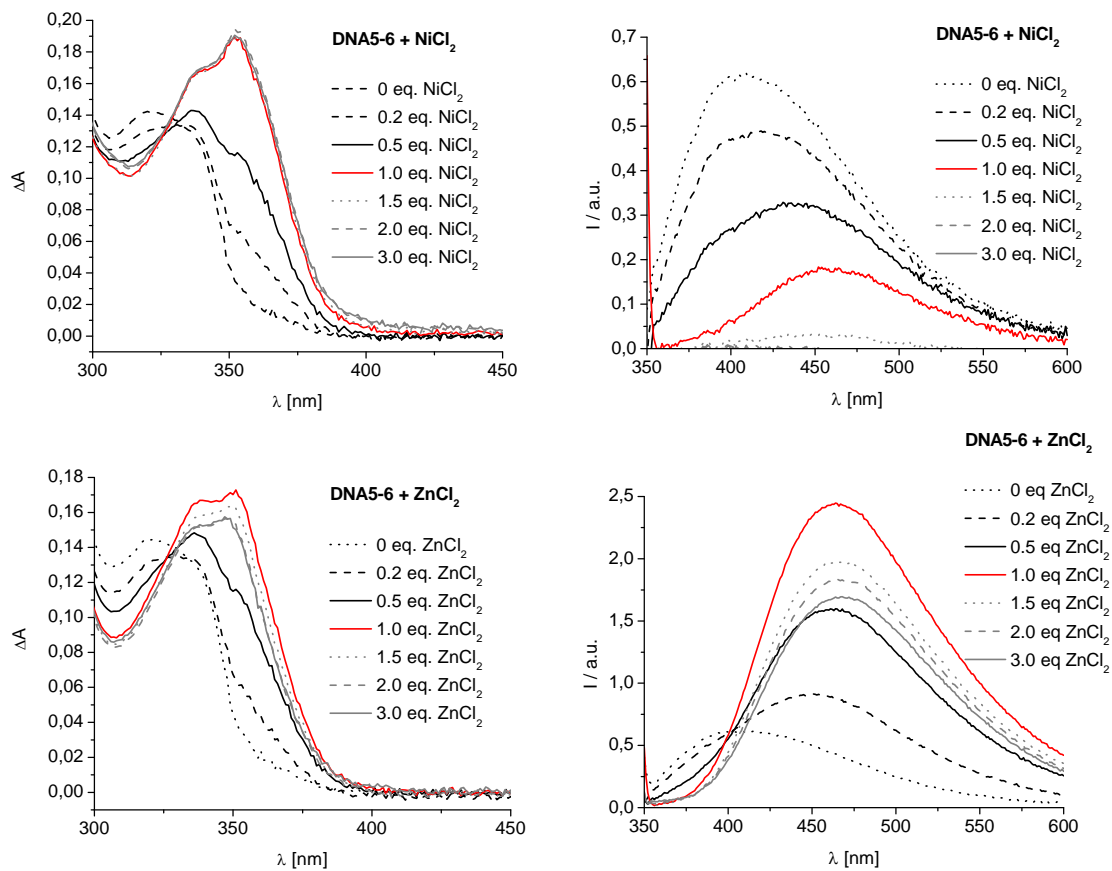

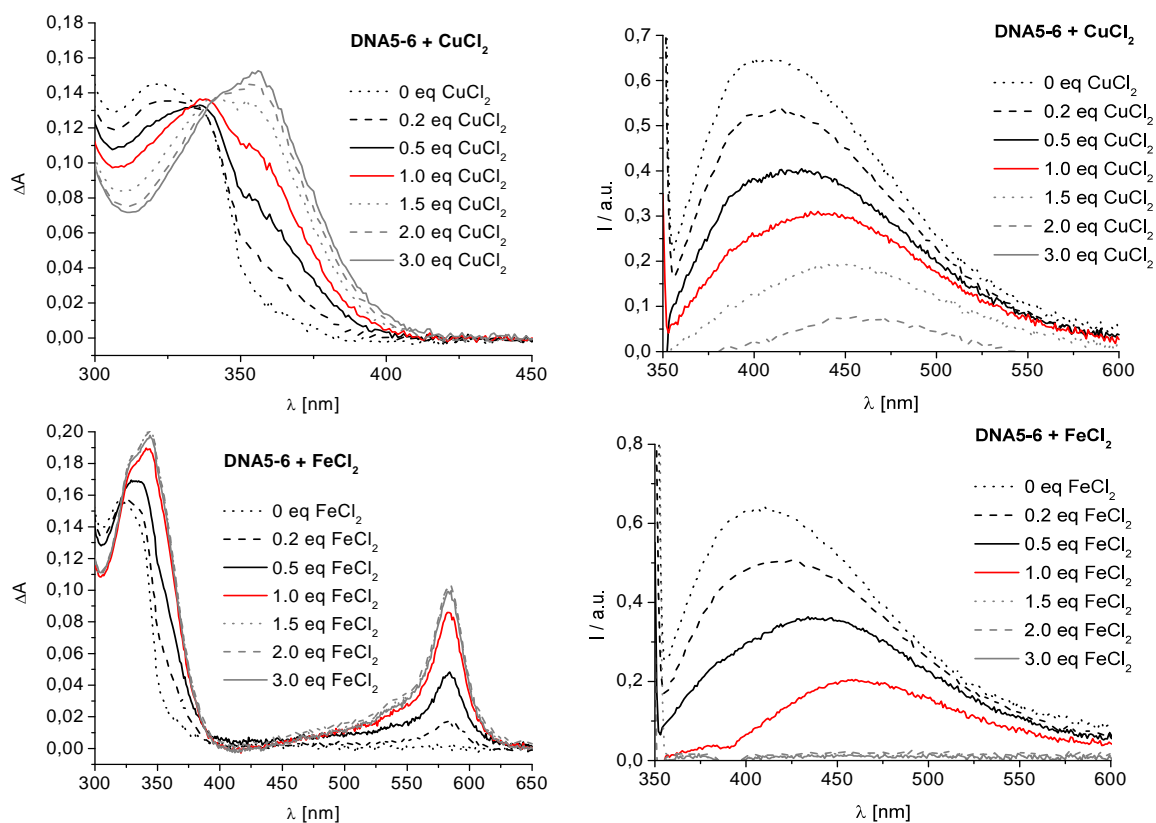

**Fig. S 4:** Changes in the absorption and emission spectra of **DNA5-6** upon addition of NiCl<sub>2</sub>, ZnCl<sub>2</sub>, CuCl<sub>2</sub> and FeCl<sub>2</sub> ( $\lambda_{\text{ex}} = 345 \text{ nm}$ )

### SB-PAGE Experiments

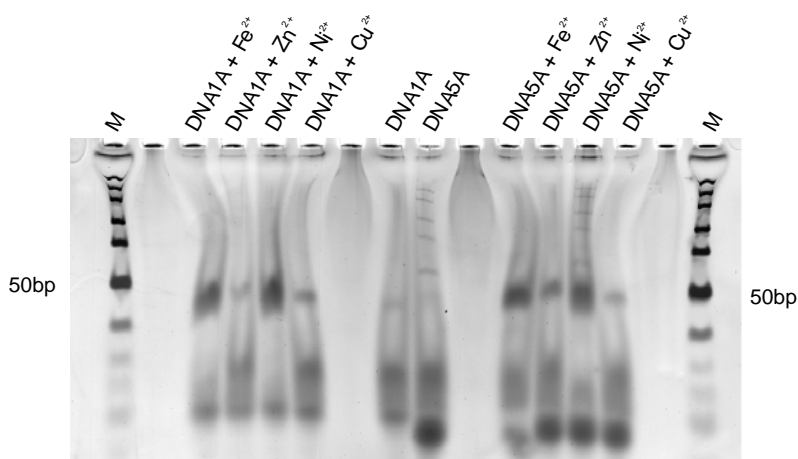

**Fig. S 5:** Top: Fluorescence quenching (Fq) for **DNA1A** (left) and **DNA5A** (right) upon addition of metal ions; bottom: non-denaturing gel electrophoresis (8 % SB-PAGE) of **DNA1A** and **DNA5A** in absence (middle lanes) and presence of metal ions after silver staining.

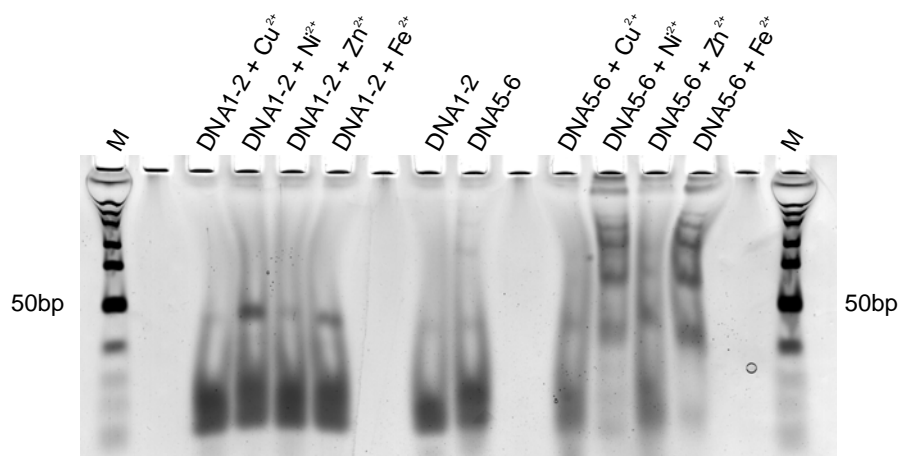

**Fig. S 5:** Top: Fluorescence quenching (Fq) for **DNA1-2** (left) and **DNA5-6** (right) upon addition of metal ions; bottom: non-denaturing gel electrophoresis (8 % SB-PAGE) of **DNA1-2** and **DNA5-6** in absence (middle lanes) and in presence of metal ions after silver staining.

## References

1. E. C. Constable, M. D. Ward, *J. Chem. Soc., Dalton Trans.* **1990**, 1405-1409.
2. K. T. Potts, D. Konwar, *J. Org. Chem.* **1991**, *56*, 4815-4816.
3. V. Grosshenny, F. M. Romero, R. Ziessel, *J. Org. Chem.* **1997**, *62*, 1491-1500.
4. R. H. E. Hudson, A. Ghorbani-Choghamarani, *Synlett* **2007**, 870-873.
